# Supplementary material for: Interactions affecting 1JC–F SSCCs in neutral and ionic 2-, 3- and 4-fluoro-substituted piperidines: normal and reverse fluorine Perlin-like effect
Source: Royal Society of Chemistry journal article supplement (doi:10.1039/c6ra10272g), 2016-01-01
Supplement: c6ra10272g1.pdf [file c6ra10272g1.pdf]

## Electronic Supplementary Information (ESI)

### **Interactions affecting $^1J_{C-F}$ SSCCs in neutral and ionic 2-, 3- and 4-fluoro-substituted piperidines: Normal and reverse fluorine Perlin-like effect**

Josué M. Silla and Matheus P. Freitas\*

*Department of Chemistry, Federal University of Lavras, P.O. Box 3037, 37200-000, Lavras-MG, Brazil*

\*Corresponding author: [matheus@dqi.ufla.br](mailto:matheus@dqi.ufla.br)

**Pages 2-13.** Standard coordinates and absolute energies (in hartrees) for the  $n$ -fluoropiperidines ( $n = 2, 3$  and  $4$ ) and the corresponding cations and anions, obtained at the  $\omega$ B97X-D/6-311++G(d,p) level.

Atom coordinates and electronic energy (E, hartree) calculated at the  $\omega$ B97X-D/6-311++G(d,p) level.

2-fluoropiperidine\_Fax-Hax (neutral). E = -351.1486455

| Center<br>Number | Atomic<br>Number | Forces (Hartrees/Bohr) |              |              |
|------------------|------------------|------------------------|--------------|--------------|
|                  |                  | X                      | Y            | Z            |
| 1                | 6                | -0.000038913           | -0.000004532 | -0.000041547 |
| 2                | 6                | 0.000032126            | 0.000061418  | -0.000007297 |
| 3                | 6                | 0.000095701            | -0.000050105 | 0.000086090  |
| 4                | 6                | -0.000019125           | -0.000025516 | 0.000066161  |
| 5                | 6                | -0.000033056           | -0.000002801 | 0.000031004  |
| 6                | 1                | -0.000010567           | -0.000007329 | -0.000019036 |
| 7                | 1                | -0.000021979           | 0.000006606  | -0.000000024 |
| 8                | 1                | -0.000016779           | 0.000001270  | 0.000021453  |
| 9                | 1                | 0.000005398            | 0.000016464  | 0.000002534  |
| 10               | 1                | -0.000004749           | -0.000023415 | -0.000009533 |
| 11               | 1                | 0.000023188            | 0.000000952  | -0.000010720 |
| 12               | 1                | 0.000009824            | 0.000005404  | -0.000007909 |
| 13               | 1                | 0.000028411            | 0.000019012  | 0.000016125  |
| 14               | 7                | -0.000014858           | -0.000073611 | 0.000016984  |
| 15               | 1                | -0.000008960           | 0.000012687  | -0.000036565 |
| 16               | 9                | -0.000020753           | 0.000030069  | -0.000078805 |
| 17               | 1                | -0.000004909           | 0.000033428  | -0.000028914 |

2-fluoropiperidine\_Fax-Heq (neutral). E = -351.1566855

| Center<br>Number | Atomic<br>Number | Forces (Hartrees/Bohr) |              |              |
|------------------|------------------|------------------------|--------------|--------------|
|                  |                  | X                      | Y            | Z            |
| 1                | 6                | -0.000017371           | -0.000003373 | -0.000020294 |
| 2                | 6                | 0.000018789            | -0.000021837 | -0.000005674 |
| 3                | 6                | 0.000001061            | -0.000012886 | -0.000016556 |
| 4                | 6                | -0.000009695           | 0.000004464  | 0.000054130  |
| 5                | 6                | -0.000013869           | -0.000018684 | 0.000029035  |
| 6                | 1                | -0.000001593           | 0.000014157  | -0.000024715 |
| 7                | 1                | -0.000011478           | 0.000021206  | -0.000005291 |
| 8                | 1                | -0.000006378           | 0.000001394  | 0.000015990  |
| 9                | 1                | 0.000002704            | 0.000010963  | -0.000002243 |
| 10               | 1                | -0.000004877           | -0.000014023 | 0.000004946  |
| 11               | 1                | 0.000006304            | -0.000009317 | 0.000000804  |
| 12               | 1                | 0.000008017            | 0.000002158  | -0.000008804 |
| 13               | 1                | 0.000016513            | 0.000001308  | 0.000013903  |
| 14               | 7                | -0.000019973           | 0.000008597  | -0.000017515 |
| 15               | 1                | 0.000018023            | 0.000002983  | -0.000021291 |
| 16               | 1                | -0.000006480           | 0.000010172  | -0.000007814 |
| 17               | 9                | 0.000020303            | 0.000002718  | 0.000011387  |

2-fluoropiperidine\_Feq-Hax (neutral). E = -351.147973

| Center<br>Number | Atomic<br>Number | Forces (Hartrees/Bohr) |              |              |
|------------------|------------------|------------------------|--------------|--------------|
|                  |                  | X                      | Y            | Z            |
| 1                | 6                | 0.000026271            | -0.000004380 | 0.000008118  |
| 2                | 6                | -0.000061274           | -0.000060132 | -0.000039225 |
| 3                | 6                | -0.000096168           | -0.000002881 | -0.000012870 |
| 4                | 6                | 0.000059425            | -0.000032807 | -0.000000817 |
| 5                | 6                | -0.000035420           | -0.000038114 | 0.000004750  |
| 6                | 1                | 0.000014646            | 0.000035081  | -0.000034497 |
| 7                | 1                | 0.000014625            | 0.000037853  | -0.000003283 |
| 8                | 1                | 0.000003728            | -0.000000038 | 0.000002764  |
| 9                | 1                | -0.000003174           | 0.000022828  | -0.000030617 |
| 10               | 1                | 0.000012721            | 0.000008333  | -0.000032372 |
| 11               | 1                | -0.000000775           | -0.000011735 | -0.000017600 |
| 12               | 1                | 0.000019185            | -0.000010122 | 0.000015130  |
| 13               | 7                | 0.000090814            | -0.000023042 | 0.000071540  |
| 14               | 1                | -0.000003953           | 0.000011908  | 0.000013624  |
| 15               | 1                | -0.000033171           | 0.000047301  | -0.000030358 |
| 16               | 9                | 0.000016275            | 0.000026405  | 0.000031944  |
| 17               | 1                | -0.000023755           | -0.000006458 | 0.000053770  |

2-fluoropiperidine\_Feq-Heq (neutral). E = -351.1492855

| Center<br>Number | Atomic<br>Number | Forces (Hartrees/Bohr) |              |              |
|------------------|------------------|------------------------|--------------|--------------|
|                  |                  | X                      | Y            | Z            |
| 1                | 6                | 0.000068827            | 0.000042614  | 0.000030297  |
| 2                | 6                | -0.000064342           | -0.000077280 | 0.000027935  |
| 3                | 6                | -0.000077080           | -0.000052207 | 0.000028397  |
| 4                | 6                | 0.000069210            | -0.000073006 | -0.000012825 |
| 5                | 6                | -0.000035316           | -0.000027596 | -0.000015984 |
| 6                | 1                | 0.000024725            | 0.000028214  | -0.000049896 |
| 7                | 1                | 0.000013433            | 0.000057499  | -0.000016730 |
| 8                | 1                | -0.000019900           | -0.000004775 | 0.000000241  |
| 9                | 1                | 0.000013387            | 0.000007714  | -0.000035915 |
| 10               | 1                | 0.000009341            | 0.000013210  | -0.000039922 |
| 11               | 1                | 0.000006783            | -0.000024445 | -0.000002893 |
| 12               | 1                | 0.000016988            | -0.000030185 | 0.000023412  |
| 13               | 7                | -0.000041670           | 0.000078937  | -0.000015938 |
| 14               | 1                | 0.000034277            | -0.000002995 | 0.000003062  |
| 15               | 1                | -0.000022406           | 0.000013637  | 0.000022380  |
| 16               | 1                | -0.000017745           | -0.000004339 | 0.000045853  |
| 17               | 9                | 0.000021488            | 0.000055003  | 0.000008526  |

2-fluoropiperidine\_Fax (cation). E = -351.5156028

| Center<br>Number | Atomic<br>Number | Forces (Hartrees/Bohr) |              |              |
|------------------|------------------|------------------------|--------------|--------------|
|                  |                  | X                      | Y            | Z            |
| 1                | 6                | 0.000009583            | 0.000005449  | -0.000007207 |
| 2                | 6                | -0.000001549           | 0.000012894  | 0.000016427  |
| 3                | 6                | -0.000009218           | -0.000023789 | -0.000041079 |
| 4                | 6                | -0.000031916           | 0.000008030  | -0.000022136 |
| 5                | 6                | -0.000007496           | -0.000009033 | -0.000002935 |
| 6                | 1                | 0.000009207            | 0.000004399  | 0.000013296  |
| 7                | 1                | 0.000028492            | -0.000004131 | 0.000013934  |
| 8                | 1                | 0.000016880            | -0.000010929 | -0.000006491 |
| 9                | 1                | 0.000012858            | -0.000005390 | -0.000006067 |
| 10               | 1                | -0.000011792           | 0.000000558  | -0.000015983 |
| 11               | 1                | -0.000008301           | -0.000007222 | -0.000015788 |
| 12               | 1                | -0.000018039           | 0.000008772  | -0.000014455 |
| 13               | 1                | -0.000007908           | -0.000004292 | -0.000024551 |
| 14               | 7                | 0.000001622            | 0.000016124  | 0.000052183  |
| 15               | 9                | 0.000000017            | -0.000000052 | 0.000030097  |
| 16               | 1                | -0.000005432           | 0.000011463  | 0.000003560  |
| 17               | 1                | 0.000004221            | 0.000005514  | 0.000018772  |
| 18               | 1                | 0.000018771            | -0.000008365 | 0.000008426  |

2-fluoropiperidine\_Feq (cation). E = -351.5163837

| Center<br>Number | Atomic<br>Number | Forces (Hartrees/Bohr) |              |              |
|------------------|------------------|------------------------|--------------|--------------|
|                  |                  | X                      | Y            | Z            |
| 1                | 6                | -0.000017359           | -0.000019531 | 0.000015475  |
| 2                | 6                | 0.000034059            | 0.000108456  | 0.000011055  |
| 3                | 6                | -0.000072287           | -0.000016737 | 0.000070261  |
| 4                | 6                | 0.000069614            | 0.000068363  | 0.000013218  |
| 5                | 6                | 0.000014534            | -0.000043150 | -0.000043861 |
| 6                | 1                | 0.000002442            | -0.000028467 | -0.000019048 |
| 7                | 1                | -0.000007920           | -0.000001304 | -0.000023070 |
| 8                | 1                | 0.000002171            | 0.000005915  | -0.000011034 |
| 9                | 1                | -0.000002664           | 0.000007826  | -0.000001643 |
| 10               | 1                | -0.000005254           | -0.000039558 | 0.000021407  |
| 11               | 1                | -0.000005252           | -0.000000900 | 0.000014686  |
| 12               | 1                | 0.000006390            | -0.000011092 | 0.000009403  |
| 13               | 1                | 0.000007983            | 0.000003769  | 0.000006958  |
| 14               | 7                | 0.000029232            | 0.000002423  | -0.000111883 |
| 15               | 1                | -0.000033938           | -0.000009191 | 0.000032733  |
| 16               | 1                | -0.000018633           | -0.000017351 | 0.000038580  |
| 17               | 1                | 0.000002093            | 0.000001068  | -0.000008129 |
| 18               | 9                | -0.000005212           | -0.000010539 | -0.000015108 |

2-fluoropiperidine\_Fax (anion). Not converged.

2-fluoropiperidine\_Feq (anion). E = -350.5215934

---

| Center<br>Number | Atomic<br>Number | Forces (Hartrees/Bohr) |              |              |
|------------------|------------------|------------------------|--------------|--------------|
|                  |                  | X                      | Y            | Z            |
| 1                | 6                | 0.000133083            | -0.000068424 | -0.000056736 |
| 2                | 6                | -0.000068246           | 0.000026130  | 0.000018561  |
| 3                | 6                | -0.000000732           | -0.000122836 | -0.000061635 |
| 4                | 6                | 0.000113945            | 0.000036209  | -0.000022372 |
| 5                | 6                | -0.000125408           | -0.000050048 | 0.000075683  |
| 6                | 1                | -0.000002917           | 0.000026385  | -0.000035087 |
| 7                | 1                | -0.000000289           | 0.000056804  | 0.000024033  |
| 8                | 1                | 0.000001789            | -0.000003454 | 0.000012867  |
| 9                | 1                | -0.000037166           | 0.000039695  | -0.000036299 |
| 10               | 1                | -0.000006408           | -0.000005802 | 0.000003430  |
| 11               | 1                | -0.000030616           | -0.000013078 | -0.000016636 |
| 12               | 1                | -0.000022151           | 0.000016204  | 0.000044936  |
| 13               | 1                | 0.000008914            | -0.000004597 | -0.000022291 |
| 14               | 1                | 0.000073562            | 0.000002295  | 0.000010177  |
| 15               | 9                | -0.000037463           | -0.000025833 | -0.000004267 |
| 16               | 7                | 0.000000101            | 0.000090349  | 0.000065636  |

---

3-fluoropiperidine\_Fax-Hax (neutral). E = -351.1451717

| Center<br>Number | Atomic<br>Number | Forces (Hartrees/Bohr) |              |              |
|------------------|------------------|------------------------|--------------|--------------|
|                  |                  | X                      | Y            | Z            |
| 1                | 6                | 0.000019986            | -0.000003456 | 0.000002197  |
| 2                | 6                | -0.000077881           | -0.000060876 | -0.000014814 |
| 3                | 6                | -0.000114214           | 0.000083789  | 0.000080561  |
| 4                | 6                | 0.000045858            | -0.000054362 | 0.000061318  |
| 5                | 6                | -0.000005435           | -0.000002478 | 0.000038028  |
| 6                | 1                | 0.000025692            | 0.000055595  | -0.000040794 |
| 7                | 1                | 0.000003979            | 0.000036524  | 0.000002468  |
| 8                | 1                | -0.000002571           | -0.000030740 | 0.000024890  |
| 9                | 1                | 0.000007183            | 0.000006649  | 0.000001636  |
| 10               | 1                | 0.000019194            | -0.000001186 | -0.000077533 |
| 11               | 1                | -0.000007258           | -0.000021457 | -0.000022962 |
| 12               | 1                | -0.000009462           | -0.000014471 | -0.000006640 |
| 13               | 1                | 0.000004565            | -0.000006397 | -0.000010044 |
| 14               | 1                | 0.000028360            | -0.000017508 | 0.000030179  |
| 15               | 7                | 0.000158369            | -0.000032762 | 0.000026407  |
| 16               | 1                | -0.000064071           | 0.000041242  | -0.000055464 |
| 17               | 9                | -0.000032296           | 0.000021894  | -0.000039434 |

3-fluoropiperidine\_Fax-Heq (neutral). E = -351.1424806

| Center<br>Number | Atomic<br>Number | Forces (Hartrees/Bohr) |              |              |
|------------------|------------------|------------------------|--------------|--------------|
|                  |                  | X                      | Y            | Z            |
| 1                | 6                | 0.000028012            | 0.000038652  | -0.000009502 |
| 2                | 6                | -0.000034855           | 0.000011476  | 0.000011576  |
| 3                | 6                | -0.000031126           | 0.000004403  | 0.000051264  |
| 4                | 6                | 0.000033306            | -0.000055241 | 0.000025835  |
| 5                | 6                | 0.000011753            | 0.000019839  | 0.000014501  |
| 6                | 1                | 0.000004676            | -0.000001672 | -0.000017894 |
| 7                | 1                | 0.000003117            | 0.000006479  | -0.000012581 |
| 8                | 1                | -0.000014654           | -0.000025834 | 0.000012224  |
| 9                | 1                | 0.000010596            | -0.000012097 | 0.000006743  |
| 10               | 1                | 0.000015169            | 0.000006795  | -0.000019742 |
| 11               | 1                | -0.000007062           | -0.000005453 | -0.000000060 |
| 12               | 1                | 0.000000483            | -0.000009192 | 0.000004299  |
| 13               | 1                | -0.000011198           | -0.000016767 | -0.000000691 |
| 14               | 1                | 0.000008904            | 0.000000906  | 0.000012032  |
| 15               | 7                | -0.000019273           | 0.000007046  | -0.000051818 |
| 16               | 9                | -0.000023833           | 0.000030234  | -0.000035303 |
| 17               | 1                | 0.000025986            | 0.000000426  | 0.000009116  |

3-fluoropiperidine\_Feq-Hax (neutral). E = -351.1438128

| Center<br>Number | Atomic<br>Number | Forces (Hartrees/Bohr) |              |              |
|------------------|------------------|------------------------|--------------|--------------|
|                  |                  | X                      | Y            | Z            |
| 1                | 6                | 0.000010795            | -0.000011993 | 0.000009788  |
| 2                | 6                | -0.000047018           | -0.000043061 | -0.000006788 |
| 3                | 6                | -0.000074689           | 0.000041276  | 0.000043326  |
| 4                | 6                | 0.000051778            | -0.000063231 | -0.000046675 |
| 5                | 6                | 0.000014908            | -0.000002813 | -0.000028795 |
| 6                | 1                | 0.000013370            | 0.000037798  | 0.000004570  |
| 7                | 1                | 0.000023768            | 0.000015844  | 0.000026339  |
| 8                | 1                | 0.000023362            | -0.000018449 | 0.000002617  |
| 9                | 1                | 0.000000393            | -0.000000299 | -0.000002959 |
| 10               | 1                | -0.000015552           | 0.000009909  | -0.000021547 |
| 11               | 1                | -0.000005895           | -0.000010160 | -0.000013727 |
| 12               | 1                | -0.000020164           | 0.000016157  | -0.000009531 |
| 13               | 1                | 0.000001242            | -0.000008034 | -0.000011923 |
| 14               | 7                | 0.000110089            | -0.000026421 | 0.000047763  |
| 15               | 1                | -0.000012830           | 0.000006537  | -0.000011719 |
| 16               | 9                | -0.000053283           | 0.000039706  | 0.000050095  |
| 17               | 1                | -0.000020274           | 0.000017233  | -0.000030836 |

3-fluoropiperidine\_Feq-Heq (neutral). E = -351.1446525

| Center<br>Number | Atomic<br>Number | Forces (Hartrees/Bohr) |              |              |
|------------------|------------------|------------------------|--------------|--------------|
|                  |                  | X                      | Y            | Z            |
| 1                | 6                | 0.000022090            | 0.000011112  | 0.000023308  |
| 2                | 6                | -0.000037038           | -0.000026205 | 0.000022720  |
| 3                | 6                | -0.000047626           | 0.000005673  | 0.000031844  |
| 4                | 6                | 0.000048942            | -0.000032876 | -0.000022381 |
| 5                | 6                | 0.000017981            | -0.000005183 | -0.000051614 |
| 6                | 1                | 0.000001433            | 0.000006709  | 0.000002918  |
| 7                | 1                | 0.000011199            | -0.000008320 | 0.000020410  |
| 8                | 1                | 0.000004040            | -0.000036588 | 0.000013441  |
| 9                | 1                | 0.000002737            | -0.000012117 | 0.000014286  |
| 10               | 1                | -0.000007428           | 0.000027864  | -0.000013535 |
| 11               | 1                | 0.000003906            | -0.000005054 | -0.000030879 |
| 12               | 1                | -0.000016009           | 0.000021375  | 0.000010950  |
| 13               | 1                | 0.000008350            | -0.000000101 | 0.000005653  |
| 14               | 7                | -0.000021433           | 0.000017883  | -0.000053175 |
| 15               | 1                | 0.000047014            | -0.000007206 | 0.000026264  |
| 16               | 1                | -0.000023259           | 0.000007431  | -0.000021794 |
| 17               | 9                | -0.000014898           | 0.000035602  | 0.000021586  |

3-fluoropiperidine\_Fax (cation). E = -351.5194527

| Center<br>Number | Atomic<br>Number | Forces (Hartrees/Bohr) |              |              |
|------------------|------------------|------------------------|--------------|--------------|
|                  |                  | X                      | Y            | Z            |
| 1                | 6                | -0.000008549           | -0.000044289 | -0.000026406 |
| 2                | 6                | 0.000014178            | 0.000067678  | 0.000013155  |
| 3                | 6                | -0.000099539           | -0.000015861 | -0.000050759 |
| 4                | 6                | 0.000056206            | -0.000037431 | 0.000067844  |
| 5                | 6                | 0.000001444            | 0.000033289  | -0.000003641 |
| 6                | 1                | 0.000001781            | -0.000023508 | -0.000017210 |
| 7                | 1                | -0.000008747           | -0.000008727 | 0.000003288  |
| 8                | 1                | 0.000012408            | 0.000000804  | 0.000012130  |
| 9                | 1                | 0.000012762            | -0.000006371 | -0.000000758 |
| 10               | 1                | -0.000005036           | 0.000015718  | -0.000009167 |
| 11               | 1                | 0.000008414            | 0.000001412  | -0.000004872 |
| 12               | 1                | 0.000009425            | 0.000004808  | 0.000028495  |
| 13               | 1                | 0.000004799            | 0.000005090  | -0.000002916 |
| 14               | 1                | 0.000004327            | -0.000021018 | 0.000008278  |
| 15               | 7                | -0.000047570           | 0.000033173  | -0.000030358 |
| 16               | 1                | 0.000010649            | 0.000006189  | 0.000023573  |
| 17               | 1                | 0.000013814            | 0.000009769  | 0.000011459  |
| 18               | 9                | 0.000019234            | -0.000020725 | -0.000022136 |

3-fluoropiperidine\_Feq (cation). E = -351.5112594

| Center<br>Number | Atomic<br>Number | Forces (Hartrees/Bohr) |              |              |
|------------------|------------------|------------------------|--------------|--------------|
|                  |                  | X                      | Y            | Z            |
| 1                | 6                | -0.000003387           | -0.000011685 | 0.000001377  |
| 2                | 6                | 0.000006969            | 0.000035092  | 0.000015814  |
| 3                | 6                | -0.000028435           | 0.000001315  | -0.000027277 |
| 4                | 6                | 0.000003041            | 0.000007323  | 0.000010843  |
| 5                | 6                | 0.000001265            | -0.000011036 | -0.000015658 |
| 6                | 1                | 0.000002741            | -0.000001960 | 0.000009367  |
| 7                | 1                | 0.000008529            | -0.000017985 | 0.000021282  |
| 8                | 1                | 0.000009329            | -0.000015935 | 0.000008477  |
| 9                | 1                | 0.000011682            | -0.000007774 | 0.000012412  |
| 10               | 1                | -0.000000675           | 0.000021894  | -0.000000118 |
| 11               | 1                | 0.000003009            | 0.000004582  | -0.000010288 |
| 12               | 1                | -0.000006075           | 0.000012678  | 0.000003435  |
| 13               | 1                | 0.000001047            | -0.000001972 | -0.000001052 |
| 14               | 7                | -0.000010030           | -0.000025030 | -0.000000855 |
| 15               | 1                | 0.000005730            | -0.000004475 | 0.000003618  |
| 16               | 1                | 0.000003060            | 0.000007180  | 0.000011476  |
| 17               | 9                | 0.000003698            | 0.000007931  | -0.000020271 |
| 18               | 1                | -0.000011498           | -0.000000144 | -0.000022581 |



3-fluoropiperidine\_Fax (anion). E = -350.5053566

| Center<br>Number | Atomic<br>Number | Forces (Hartrees/Bohr) |              |              |
|------------------|------------------|------------------------|--------------|--------------|
|                  |                  | X                      | Y            | Z            |
| 1                | 6                | 0.000084412            | -0.000010027 | -0.000038500 |
| 2                | 6                | 0.000007811            | 0.000010672  | 0.000053347  |
| 3                | 6                | -0.000003115           | -0.000045611 | 0.000067015  |
| 4                | 6                | 0.000088666            | -0.000005802 | 0.000083537  |
| 5                | 6                | -0.000067095           | -0.000030052 | 0.000016059  |
| 6                | 1                | -0.000004138           | 0.000022465  | -0.000009895 |
| 7                | 1                | 0.000023927            | 0.000034220  | 0.000006501  |
| 8                | 1                | -0.000010641           | -0.000019184 | 0.000010199  |
| 9                | 1                | 0.000019433            | -0.000001551 | 0.000002383  |
| 10               | 1                | -0.000032840           | 0.000030366  | -0.000037492 |
| 11               | 1                | -0.000016563           | -0.000009516 | -0.000018095 |
| 12               | 1                | -0.000025515           | -0.000014132 | -0.000016808 |
| 13               | 1                | 0.000023845            | 0.000003703  | -0.000006449 |
| 14               | 1                | 0.000019594            | -0.000021733 | 0.000004987  |
| 15               | 7                | -0.000031299           | 0.000014600  | -0.000039817 |
| 16               | 9                | -0.000076482           | 0.000041581  | -0.000076972 |

3-fluoropiperidine\_Feq (anion). E = -350.5115927

| Center<br>Number | Atomic<br>Number | Forces (Hartrees/Bohr) |              |              |
|------------------|------------------|------------------------|--------------|--------------|
|                  |                  | X                      | Y            | Z            |
| 1                | 6                | 0.000143082            | -0.000047841 | -0.000021824 |
| 2                | 6                | -0.000082061           | -0.000104200 | 0.000029530  |
| 3                | 6                | -0.000002723           | 0.000013287  | 0.000067256  |
| 4                | 6                | 0.000152666            | -0.000035051 | 0.000040818  |
| 5                | 6                | -0.000112232           | -0.000047595 | 0.000021916  |
| 6                | 1                | -0.000031534           | 0.000040917  | -0.000034815 |
| 7                | 1                | 0.000016598            | 0.000022442  | 0.000034164  |
| 8                | 1                | 0.000021563            | -0.000019095 | 0.000030074  |
| 9                | 1                | -0.000044221           | 0.000021717  | -0.000012130 |
| 10               | 1                | -0.000036548           | 0.000014762  | -0.000040430 |
| 11               | 1                | 0.000000436            | -0.000034055 | -0.000028727 |
| 12               | 1                | -0.000010756           | 0.000025987  | -0.000026415 |
| 13               | 1                | 0.000031243            | 0.000012235  | 0.000006775  |
| 14               | 7                | 0.000048408            | 0.000037769  | -0.000026383 |
| 15               | 9                | -0.000068839           | 0.000058618  | 0.000068504  |
| 16               | 1                | -0.000025081           | 0.000040103  | -0.000108314 |

4-fluoropiperidine\_Fax-Hax (neutral). E = -351.1441981

| Center<br>Number | Atomic<br>Number | Forces (Hartrees/Bohr) |              |              |
|------------------|------------------|------------------------|--------------|--------------|
|                  |                  | X                      | Y            | Z            |
| 1                | 6                | 0.000102801            | 0.000026895  | -0.000015378 |
| 2                | 6                | 0.000001357            | 0.000006187  | 0.000013181  |
| 3                | 6                | -0.000020452           | 0.000029220  | -0.000053698 |
| 4                | 6                | 0.000015012            | 0.000000111  | 0.000006605  |
| 5                | 6                | -0.000034766           | 0.000081529  | 0.000063015  |
| 6                | 1                | -0.000007271           | 0.000019569  | -0.000011846 |
| 7                | 1                | -0.000039057           | 0.000013261  | -0.000021358 |
| 8                | 1                | -0.000019925           | -0.000000415 | 0.000012808  |
| 9                | 1                | -0.000004041           | -0.000012910 | 0.000002511  |
| 10               | 1                | 0.000003846            | 0.000015786  | -0.000018124 |
| 11               | 1                | -0.000009742           | -0.000016239 | 0.000013712  |
| 12               | 1                | 0.000004608            | -0.000004190 | -0.000046424 |
| 13               | 1                | 0.000016946            | -0.000014385 | -0.000008324 |
| 14               | 1                | 0.000005003            | -0.000022343 | 0.000005727  |
| 15               | 7                | -0.000026548           | -0.000140333 | 0.000048502  |
| 16               | 1                | -0.000008043           | 0.000036847  | -0.000039247 |
| 17               | 9                | 0.000020271            | -0.000018592 | 0.000048339  |

4-fluoropiperidine\_Fax-Heq (neutral). E = -351.1454491

| Center<br>Number | Atomic<br>Number | Forces (Hartrees/Bohr) |              |              |
|------------------|------------------|------------------------|--------------|--------------|
|                  |                  | X                      | Y            | Z            |
| 1                | 6                | 0.000025460            | -0.000011527 | 0.000012938  |
| 2                | 6                | -0.000002805           | -0.000015370 | 0.000004751  |
| 3                | 6                | -0.000017948           | 0.000009371  | -0.000038072 |
| 4                | 6                | -0.000003239           | -0.000015536 | 0.000004998  |
| 5                | 6                | -0.000005522           | 0.000000729  | 0.000030468  |
| 6                | 1                | 0.000000149            | -0.000000120 | -0.000007547 |
| 7                | 1                | -0.000003918           | 0.000004831  | -0.000001452 |
| 8                | 1                | -0.000004678           | 0.000004200  | 0.000002880  |
| 9                | 1                | -0.000006019           | 0.000002353  | -0.000004077 |
| 10               | 1                | 0.000004904            | 0.000003246  | 0.000000513  |
| 11               | 1                | 0.000002928            | 0.000002315  | -0.000005334 |
| 12               | 1                | 0.000006055            | 0.000000019  | -0.000003242 |
| 13               | 1                | 0.000000121            | 0.000004989  | 0.000003017  |
| 14               | 7                | -0.000006397           | 0.000028566  | -0.000031638 |
| 15               | 1                | -0.000003244           | -0.000016963 | 0.000005940  |
| 16               | 9                | 0.000009915            | -0.000007165 | 0.000022618  |
| 17               | 1                | 0.000004237            | 0.000006062  | 0.000003238  |

4-fluoropiperidine\_Feq-Hax (neutral). E = -351.1450951

| Center<br>Number | Atomic<br>Number | Forces (Hartrees/Bohr) |              |              |
|------------------|------------------|------------------------|--------------|--------------|
|                  |                  | X                      | Y            | Z            |
| 1                | 6                | 0.000089303            | 0.000036831  | -0.000024590 |
| 2                | 6                | -0.000014195           | -0.000018389 | 0.000025094  |
| 3                | 6                | -0.000042805           | -0.000063872 | -0.000029488 |
| 4                | 6                | 0.000016228            | -0.000030765 | 0.000008546  |
| 5                | 6                | -0.000031856           | 0.000084116  | 0.000044431  |
| 6                | 1                | -0.000009890           | 0.000005699  | 0.000001151  |
| 7                | 1                | -0.000046990           | 0.000002485  | -0.000027609 |
| 8                | 1                | -0.000014195           | 0.000006635  | -0.000004647 |
| 9                | 1                | 0.000007598            | -0.000000700 | -0.000008582 |
| 10               | 1                | 0.000008293            | 0.000004686  | 0.000027479  |
| 11               | 1                | -0.000002970           | -0.000014694 | -0.000052979 |
| 12               | 1                | 0.000005096            | -0.000000497 | -0.000015908 |
| 13               | 1                | 0.000020158            | -0.000000054 | 0.000020949  |
| 14               | 7                | -0.000016949           | -0.000126190 | 0.000056411  |
| 15               | 1                | -0.000012913           | 0.000054111  | -0.000060262 |
| 16               | 1                | 0.000008026            | -0.000015912 | 0.000024673  |
| 17               | 9                | 0.000038061            | 0.000076509  | 0.000015332  |

4-fluoropiperidine\_Feq-Heq (neutral). E = -351.1452919

| Center<br>Number | Atomic<br>Number | Forces (Hartrees/Bohr) |              |              |
|------------------|------------------|------------------------|--------------|--------------|
|                  |                  | X                      | Y            | Z            |
| 1                | 6                | 0.000036803            | 0.000124757  | 0.000109664  |
| 2                | 6                | -0.000162339           | 0.000049597  | 0.000110196  |
| 3                | 6                | -0.000108160           | -0.000385151 | 0.000080886  |
| 4                | 6                | 0.000175345            | -0.000080651 | -0.000075024 |
| 5                | 6                | 0.000136104            | 0.000085441  | 0.000054295  |
| 6                | 1                | 0.000023716            | -0.000035916 | 0.000017028  |
| 7                | 1                | -0.000001264           | -0.000045949 | -0.000006181 |
| 8                | 1                | -0.000049519           | -0.000021425 | -0.000054546 |
| 9                | 1                | -0.000014538           | -0.000020169 | 0.000038308  |
| 10               | 1                | -0.000024125           | 0.000051234  | 0.000000677  |
| 11               | 1                | -0.000029612           | -0.000034954 | 0.000009588  |
| 12               | 1                | -0.000035549           | -0.000025840 | -0.000062314 |
| 13               | 1                | 0.000036863            | 0.000028958  | -0.000032360 |
| 14               | 7                | -0.000071566           | -0.000062820 | -0.000086110 |
| 15               | 1                | -0.000041117           | 0.000056282  | -0.000112993 |
| 16               | 9                | 0.000095739            | 0.000248610  | -0.000000954 |
| 17               | 1                | 0.000033219            | 0.000067997  | 0.000009840  |

4-fluoropiperidine\_Fax (cation). E = -351.5193963

| Center<br>Number | Atomic<br>Number | Forces (Hartrees/Bohr) |              |              |
|------------------|------------------|------------------------|--------------|--------------|
|                  |                  | X                      | Y            | Z            |
| 1                | 6                | -0.000018552           | 0.000006380  | 0.000006918  |
| 2                | 6                | 0.000009195            | 0.000040059  | 0.000002760  |
| 3                | 6                | 0.000017318            | -0.000026639 | -0.000025379 |
| 4                | 6                | -0.000035887           | -0.000014510 | -0.000004384 |
| 5                | 6                | 0.000003766            | 0.000007010  | -0.000009167 |
| 6                | 1                | 0.000012970            | 0.000001037  | -0.000020210 |
| 7                | 1                | -0.000007774           | -0.000004776 | 0.000004520  |
| 8                | 1                | -0.000005390           | -0.000006354 | 0.000006991  |
| 9                | 1                | 0.000018062            | 0.000001033  | -0.000003213 |
| 10               | 1                | 0.000019086            | 0.000002757  | -0.000002408 |
| 11               | 1                | -0.000004878           | -0.000001386 | 0.000009032  |
| 12               | 1                | 0.000007660            | -0.000006385 | 0.000012067  |
| 13               | 7                | -0.000017119           | -0.000008074 | -0.000004428 |
| 14               | 1                | -0.000004293           | 0.000021659  | -0.000003080 |
| 15               | 1                | -0.000003316           | -0.000000892 | 0.000001555  |
| 16               | 1                | -0.000010859           | -0.000000285 | 0.000001493  |
| 17               | 9                | 0.000005093            | -0.000011310 | 0.000023302  |
| 18               | 1                | 0.000014917            | 0.000000677  | 0.000003629  |

4-fluoropiperidine\_Feq (cation). E = -351.5143783

| Center<br>Number | Atomic<br>Number | Forces (Hartrees/Bohr) |              |              |
|------------------|------------------|------------------------|--------------|--------------|
|                  |                  | X                      | Y            | Z            |
| 1                | 6                | -0.000002594           | 0.000014683  | 0.000006213  |
| 2                | 6                | 0.000003123            | 0.000027621  | -0.000002801 |
| 3                | 6                | 0.000012400            | -0.000014030 | -0.000016981 |
| 4                | 6                | -0.000014283           | -0.000017593 | -0.000008349 |
| 5                | 6                | 0.000001917            | 0.000001825  | 0.000001704  |
| 6                | 1                | 0.000010072            | -0.000000644 | -0.000010966 |
| 7                | 1                | -0.000004848           | -0.000004839 | -0.000004284 |
| 8                | 1                | -0.000009148           | -0.000006322 | 0.000005397  |
| 9                | 1                | 0.000013409            | -0.000004087 | 0.000004731  |
| 10               | 1                | 0.000014223            | -0.000001816 | 0.000005729  |
| 11               | 1                | -0.000008394           | -0.000000750 | 0.000007096  |
| 12               | 7                | -0.000026888           | -0.000010657 | 0.000006836  |
| 13               | 1                | -0.000003619           | 0.000018418  | -0.000003797 |
| 14               | 1                | -0.000003376           | 0.000005926  | -0.000010936 |
| 15               | 1                | -0.000004092           | 0.000002523  | -0.000003563 |
| 16               | 1                | 0.000009636            | 0.000002885  | -0.000000811 |
| 17               | 9                | 0.000001555            | -0.000005281 | 0.000009907  |
| 18               | 1                | 0.000010907            | -0.000007862 | 0.000014876  |

4-fluoropiperidine\_Fax (anion). E = -350.5045158

| Center<br>Number | Atomic<br>Number | Forces (Hartrees/Bohr) |              |              |
|------------------|------------------|------------------------|--------------|--------------|
|                  |                  | X                      | Y            | Z            |
| 1                | 6                | 0.000075281            | -0.000040787 | -0.000030173 |
| 2                | 6                | -0.000047620           | -0.000041668 | -0.000007242 |
| 3                | 6                | -0.000091347           | 0.000005469  | 0.000024756  |
| 4                | 6                | 0.000079103            | 0.000047153  | 0.000014194  |
| 5                | 6                | -0.000043504           | 0.000039664  | -0.000078282 |
| 6                | 1                | -0.000011976           | 0.000018934  | -0.000031720 |
| 7                | 1                | 0.000000640            | 0.000007837  | 0.000002689  |
| 8                | 1                | -0.000004022           | -0.000002086 | 0.000027720  |
| 9                | 1                | -0.000028633           | 0.000002465  | -0.000002746 |
| 10               | 1                | -0.000029121           | -0.000000007 | -0.000004805 |
| 11               | 1                | 0.000001404            | -0.000020473 | 0.000016886  |
| 12               | 1                | 0.000019179            | -0.000014965 | 0.000026091  |
| 13               | 7                | 0.000048637            | 0.000000728  | -0.000023155 |
| 14               | 1                | 0.000019368            | 0.000044851  | -0.000010825 |
| 15               | 9                | 0.000010362            | -0.000042782 | 0.000084961  |
| 16               | 1                | 0.000002249            | -0.000004333 | -0.000008349 |

4-fluoropiperidine\_Feq (anion). E = -350.5126689

| Center<br>Number | Atomic<br>Number | Forces (Hartrees/Bohr) |              |              |
|------------------|------------------|------------------------|--------------|--------------|
|                  |                  | X                      | Y            | Z            |
| 1                | 6                | 0.000061440            | 0.000025025  | -0.000010274 |
| 2                | 6                | -0.000118288           | -0.000275863 | 0.000083449  |
| 3                | 6                | -0.000169837           | -0.000025885 | 0.000330041  |
| 4                | 6                | 0.000041536            | -0.000015072 | -0.000020408 |
| 5                | 6                | 0.000435503            | -0.000010875 | 0.000034379  |
| 6                | 1                | -0.000033252           | 0.000154829  | -0.000145084 |
| 7                | 1                | -0.000027295           | 0.000119535  | 0.000017571  |
| 8                | 1                | 0.000039834            | -0.000070610 | 0.000088394  |
| 9                | 1                | -0.000026134           | 0.000028254  | -0.000004091 |
| 10               | 1                | -0.000040885           | 0.000022063  | -0.000200706 |
| 11               | 1                | -0.000031250           | -0.000009010 | -0.000023501 |
| 12               | 1                | 0.000040517            | -0.000031877 | 0.000106911  |
| 13               | 1                | -0.000015745           | 0.000027163  | -0.000050532 |
| 14               | 7                | 0.000243599            | 0.000018647  | -0.000135395 |
| 15               | 9                | -0.000417940           | -0.000012387 | 0.000033609  |
| 16               | 1                | 0.000018194            | 0.000056062  | -0.000104363 |
